# Supplementary material for: Advantages of electrodes with dendrimer-protected platinum nanoparticles and carbon nanotubes for electrochemical methanol oxidation
Source: Royal Society of Chemistry journal article supplement (doi:10.1039/c3cp43636e), 2013-01-01
Supplement: c3cp43636e.pdf [file c3cp43636e.pdf]

## Supporting information

Advantages of electrodes with dendrimer-protected platinum nanoparticles and carbon nanotubes for electrochemical methanol oxidation

*Ampornphan Siriviriyannun<sup>a</sup> and Toyoko Imae<sup>a,b\*</sup>*

<sup>a</sup> Graduate Institute of Applied Science and Technology and

<sup>b</sup> Department of Chemical Engineering, National Taiwan University of Science and Technology,  
43 Keelung Road, Section 4, Taipei 10607, Taiwan ROC

\*To whom correspondence should be addressed. E-mail: [imae@mail.ntust.edu.tw](mailto:imae@mail.ntust.edu.tw)

**Table S1.** Anodic peak potentials ( $E_{pa}$ ) and ratios ( $I_F/I_R$ ) of anodic peak currents at forward ( $I_F$ ) and reverse ( $I_R$ ) scans. The peak current density is compensated for non-Faraday current.

| Sample | DEN(PtNP)s-loaded SAM-SPCG Electrode |            |           | CNT/DEN(PtNP)s-loaded SAM-SPCG Electrode |            |           | DEN(PtNP)s-loaded SPCGC Electrode |            |           | CNT/DEN(PtNP)s-loaded SPCGC Electrode |            |           |
|--------|--------------------------------------|------------|-----------|------------------------------------------|------------|-----------|-----------------------------------|------------|-----------|---------------------------------------|------------|-----------|
|        | $E_{pa}$ (V)                         | $I_F$ (mA) | $I_F/I_R$ | $E_{pa}$ (V)                             | $I_F$ (mA) | $I_F/I_R$ | $E_{pa}$ (V)                      | $I_F$ (mA) | $I_F/I_R$ | $E_{pa}$ (V)                          | $I_F$ (mA) | $I_F/I_R$ |
| 0.1    | 0.38                                 | 0.41       | -         | 0.39                                     | 0.14       | -         | 0.30                              | 0.02       | -         | 0.39                                  | 0.25       | -         |
| 0.2    | 0.42                                 | 0.35       | -         | 0.44                                     | 0.15       | -         | 0.47                              | 0.17       | 2.28      | 0.40                                  | 0.35       | -         |
| 0.3    | 0.54                                 | 0.65       | -         | 0.45                                     | 0.15       | -         | 0.54                              | 0.68       | 3.10      | 0.53                                  | 1.74       | 4.24      |
| 0.4    | 0.50                                 | 1.71       | 6.33      | 0.45                                     | 0.19       | -         |                                   |            |           | 0.50                                  | 1.94       | 7.76      |
| 0.5    | 0.58                                 | 2.57       | 4.94      | 0.52                                     | 0.32       | -         |                                   |            |           | 0.50                                  | 2.19       | 8.11      |

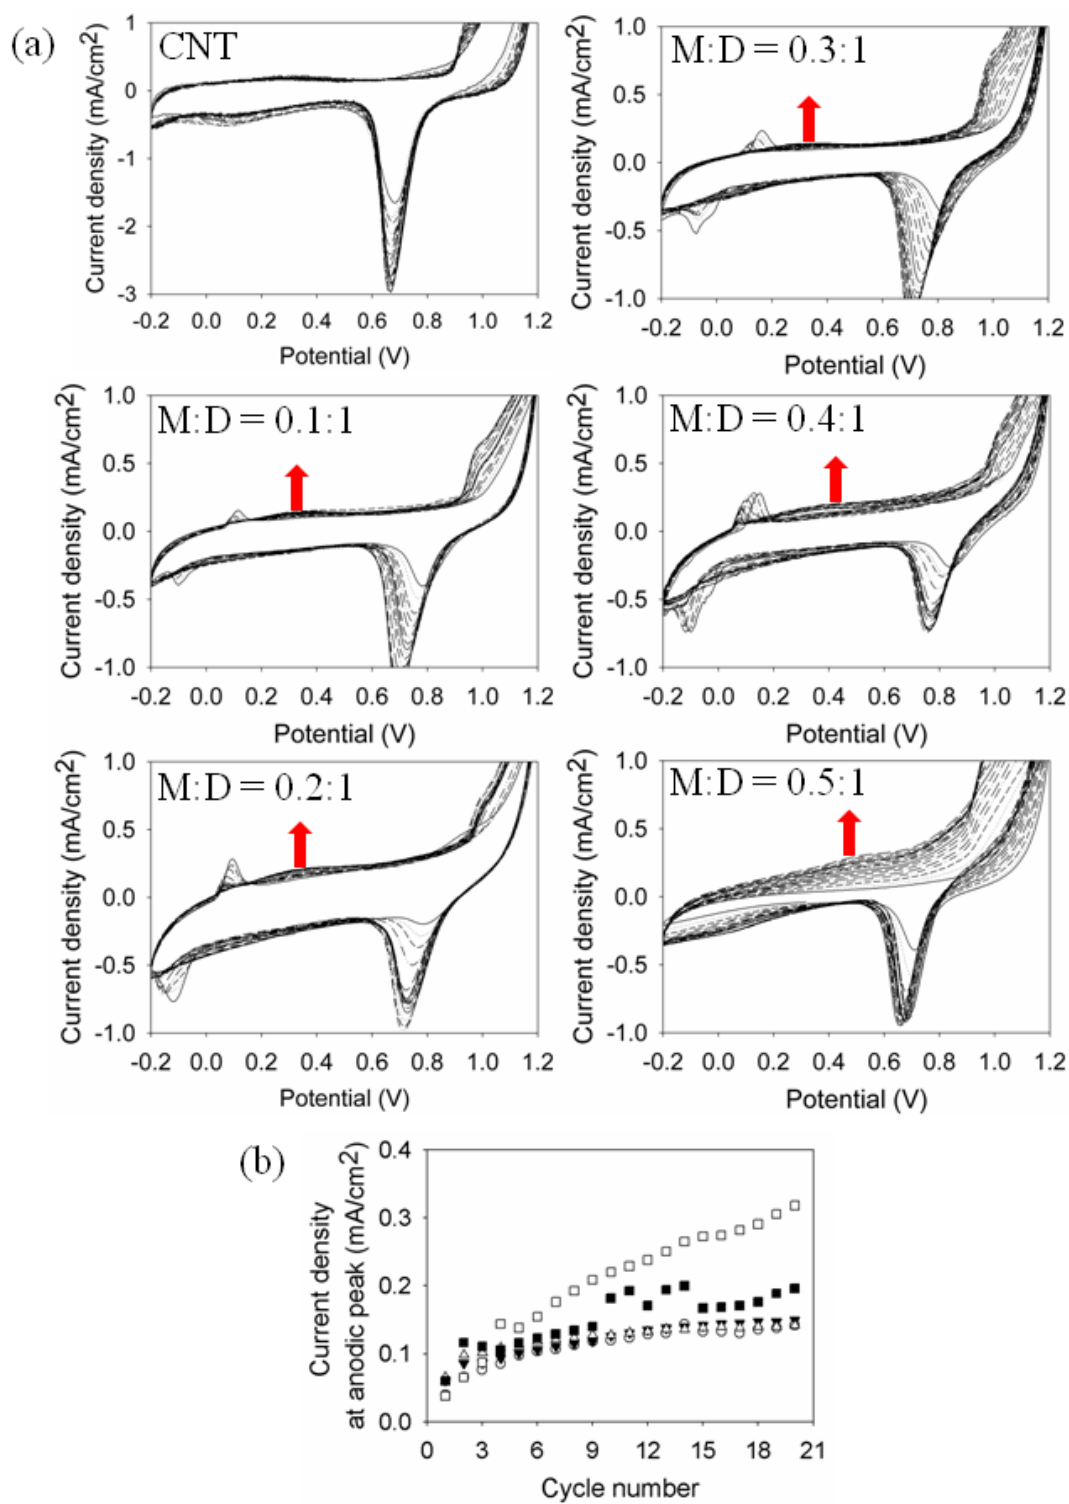

**Figure S1.** (a) Cyclic voltammograms of CNT/DEN(PtNP)s-loaded SAM-SPCG electrodes in an 0.5 M  $H_2SO_4$  solution with 2 M MeOH and (b) a plot of current density (compensated for non-Faraday current) at anodic peak against cycle number. CNT-loaded: ●. CNT/DEN(PtNP)s-loaded (M:D): ○ 0.1:1, ▼ 0.2:1, △ 0.3:1, ■ 0.4:1, □ 0.5:1.

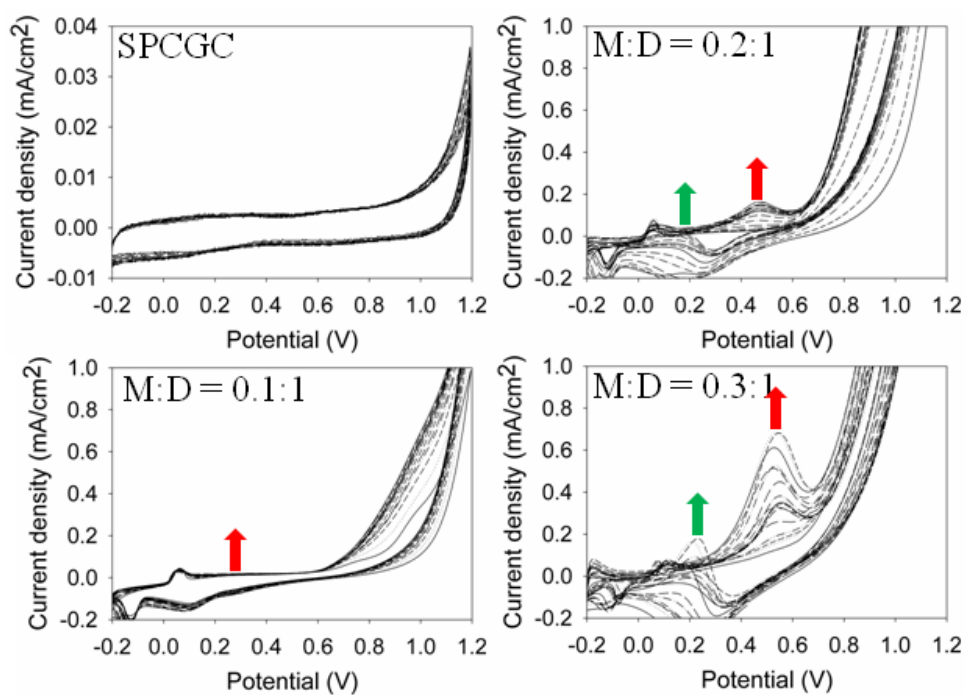

**Figure S2.** Cyclic voltammograms of DEN(PtNP)s-loaded SPCGC electrodes in an aqueous 0.5 M  $\text{H}_2\text{SO}_4$  solution with 2 M MeOH.

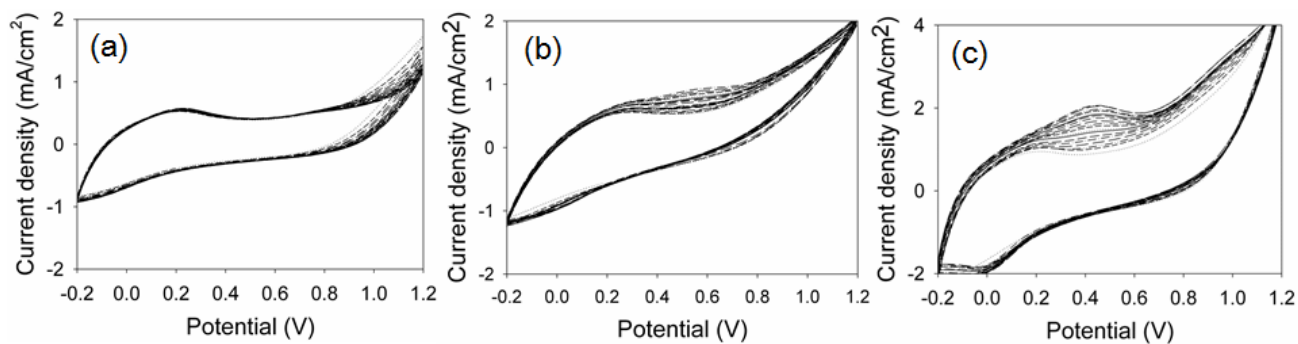

**Figure S3.** Cyclic voltammograms of CNT/DEN(PtNP)s-loaded SPCGC electrodes at M:D = (a) 0.1:1, (b) 0.3:1 and (c) 0.5:1 in an aqueous 0.5 M  $\text{H}_2\text{SO}_4$  solution with 0.1 M MeOH.
